# Supplementary material
Source: publisher figshare collection journal article supplement (https://acs.figshare.com/ndownloader/files/3847498)
Supplement: Supplementary file 1 [file 3847498]

Supporting Information:

## In-situ Raman Spectroscopy of Sulfur Speciation in Lithium-Sulfur Batteries

Heng-Liang Wu, Laura A. Huff, Andrew A. Gewirth\*

Department of Chemistry, University of Illinois at Urbana-Champaign, 600 S.

Mathews Avenue, Urbana, IL 61801 USA

\*Corresponding Author. Email: [agewirth@illinois.edu](mailto:agewirth@illinois.edu). Telephone: 217-333-8329.

Fax: 217-244-5186.

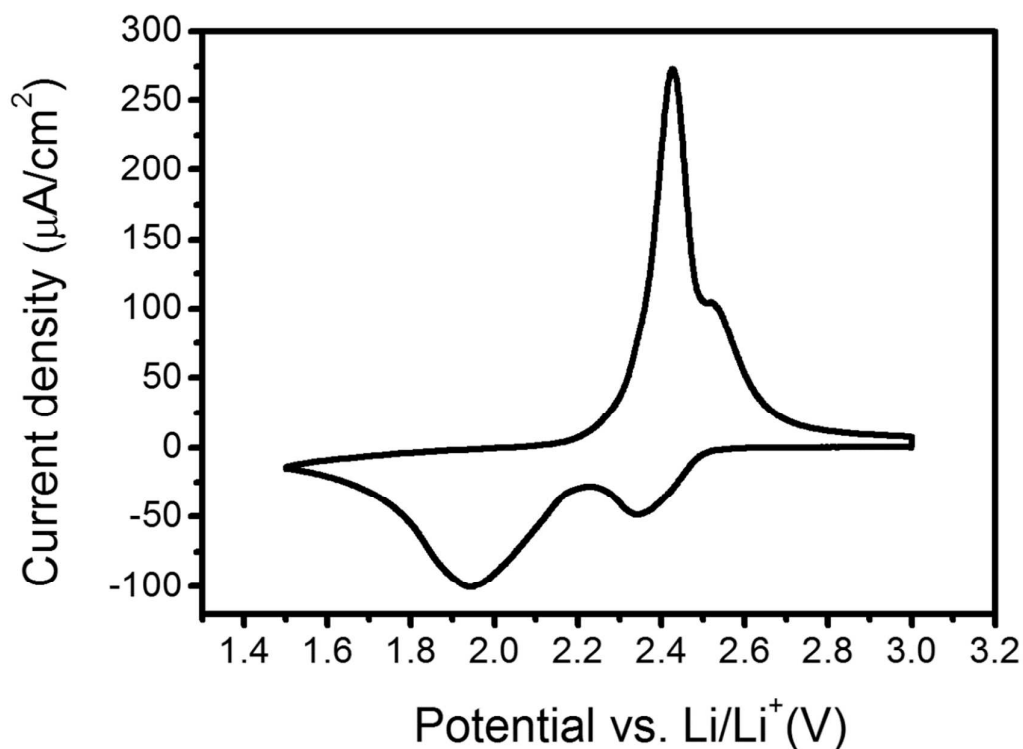

Figure S1. Cyclic voltammetry of the as-prepared sulfur-carbon cathode at a scan rate of 20  $\mu\text{V}/\text{s}$  in a coin cell.

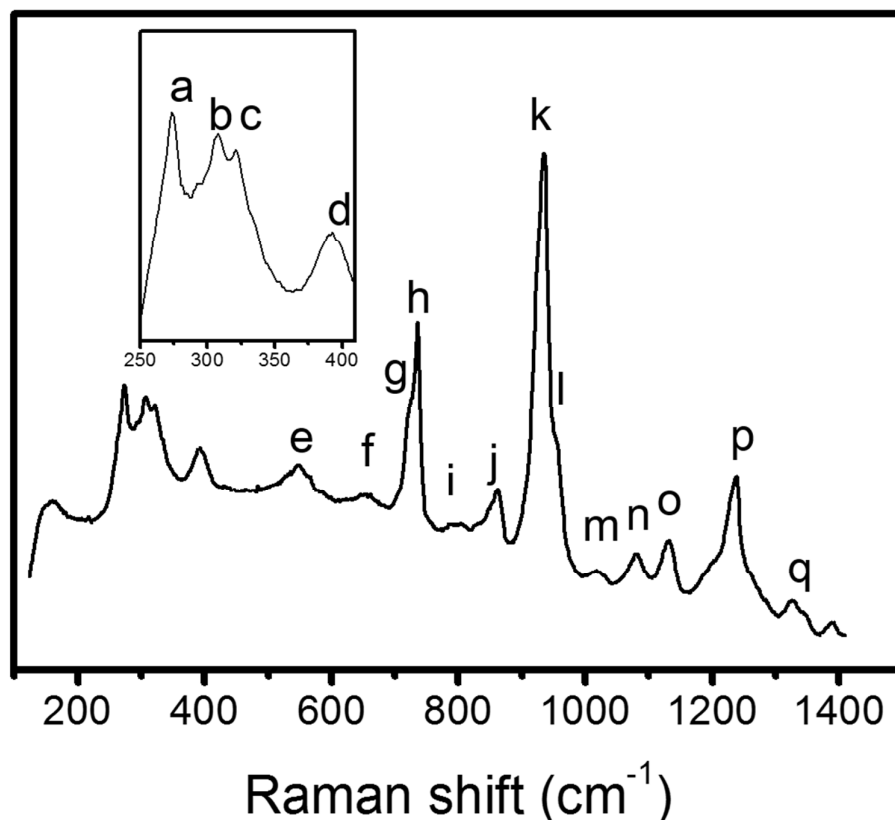

Figure S2. In-situ Raman spectra of the sulfur-carbon cathode shown at 3.2 V in 1M LiTFSI with TEGDME/DIOX (1:1, by vol).

| Peak label | Peak position (cm <sup>-1</sup> ) | Assignment (cm <sup>-1</sup> )                                                             |
|------------|-----------------------------------|--------------------------------------------------------------------------------------------|
| a          | 273                               | CF <sub>3</sub> (rocking mode from TFSI <sup>-</sup> )                                     |
| b          | 307                               | SO <sub>2</sub> (rocking mode from TFSI <sup>-</sup> )                                     |
| c          | 321                               | SO <sub>2</sub> (rocking mode from TFSI <sup>-</sup> )                                     |
| d          | 392                               | SO <sub>2</sub> (wagging mode from TFSI <sup>-</sup> )                                     |
| e          | 522-573 (broad peak)              | O-C-C (bending mode from TEGDME)<br>CF <sub>3</sub> (bending mode from TFSI <sup>-</sup> ) |
| f          | 644-661 (broad peak)              | SNS (bending mode from TFSI <sup>-</sup> )<br>Ring deformation from 1,3-Dioxolane          |
| g          | 722                               | C-O-C (bending mode from 1,3-Dioxolane)                                                    |
| h          | 735                               | CF <sub>3</sub> (bending mode from TFSI <sup>-</sup> )                                     |
| i          | 782-810 (broad peak)              | C-S (stretching mode from TFSI <sup>-</sup> )                                              |
| j          | 863                               | CH <sub>2</sub> (rocking mode from TEGDME)                                                 |
| k          | 934                               | C-O + C-C (stretching mode from 1,3-Dioxolane)                                             |
| l          | 955                               | C-O (stretching mode from 1,3-Dioxolane)                                                   |
| m          | 1023                              | C-O stretching from TEGDME                                                                 |
| n          | 1080                              | C-O stretching and CH <sub>2</sub> rocking mode from 1,3-Dioxolane                         |
| o          | 1132                              | SO <sub>2</sub> (stretching mode from TFSI <sup>-</sup> )                                  |
| p          | 1237                              | CH <sub>2</sub> (twisting mode from 1,3-Dioxolane)                                         |
| q          | 1325                              | CH <sub>2</sub> (wagging mode from 1,3-Dioxolane)                                          |

Table S1. Vibrational frequencies and assignments for TFSI<sup>-</sup>, TEGDME and DIOX as shown in Figure S2.<sup>1-4</sup>

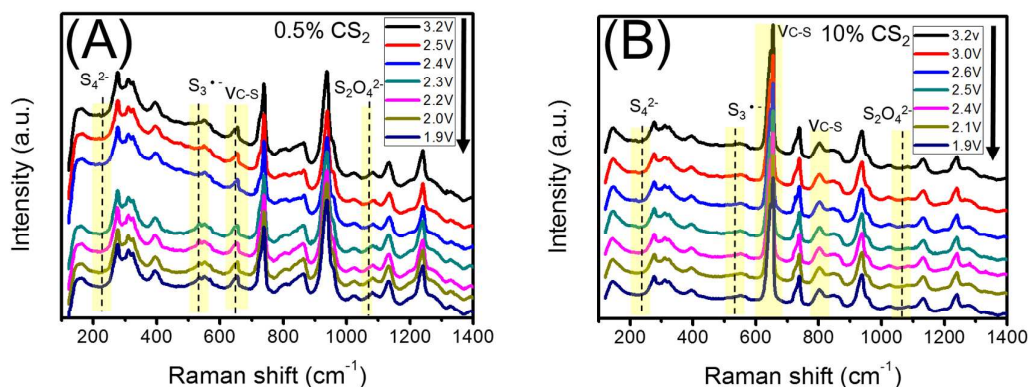

Figure S3. In-situ Raman spectra of sulfur-carbon cathode obtained during discharge with (A) 0.5% CS<sub>2</sub> additive and (B) 10% CS<sub>2</sub> additive (by vol.) at 3.2 V.<sup>5,6</sup>

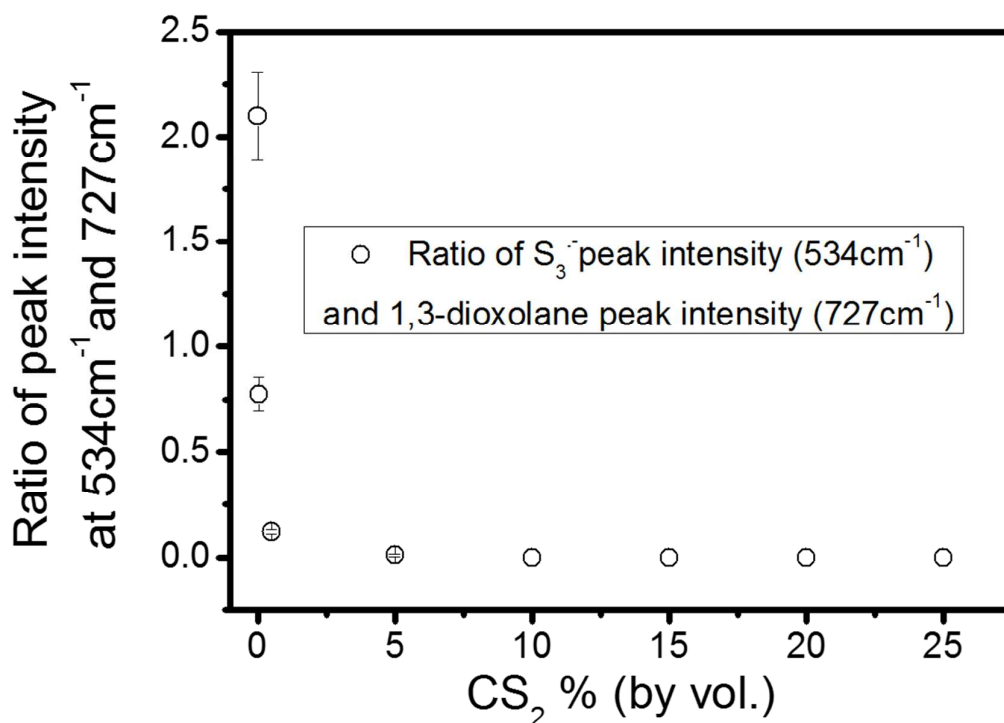

Figure S4. The ratio of maximum peak intensity for S<sub>3</sub><sup>2-</sup> (534 cm<sup>-1</sup>) and C-O-C bending mode of 1,3-dioxolane (727 cm<sup>-1</sup>) were plotted as a function of different amounts of CS<sub>2</sub>.

Figure S4 shows the peak intensity ratio of the S<sub>3</sub><sup>2-</sup> peak at 534 cm<sup>-1</sup> and the C-O-C bending mode of 1,3-dioxolane at 727 cm<sup>-1</sup> as a function of different amounts of added CS<sub>2</sub>. The intensity of the 1,3-dioxolane peak at 727 cm<sup>-1</sup> is constant and can

be used as an internal standard. This result shows the formation of  $S_3^{2-}$  in the second anodic peak is suppressed with  $CS_2$  addition. The ratio quickly drops with addition of as little as 0.05%  $CS_2$  and  $S_3^{2-}$  formation was not observed with 10% or more  $CS_2$ .

## References:

- (1) de Zea Bermudez, V.; Lucazeau, G.; Abello, L.; Poinsignon, C. Infrared and Raman spectroscopic study of polyether solutions of sulphamide Part I: Tetraethyleneglycol dimethyl ether and water. *J. Mol. Struct.* **1993**, *301*, 7-19.
- (2) Mohaček-Grošev, V.; Furić, K.; Ivanković, H. Observed bands in Raman and infrared spectra of 1,3-dioxolane and their assignments. *Vib. Spectrosc.* **2013**, *64*, 101-107.
- (3) Rey, I.; Johansson, P.; Lindgren, J.; Lassègues, J. C.; Grondin, J.; Servant, L. Spectroscopic and Theoretical Study of  $(CF_3SO_2)_2N^-$  (TFSI-) and  $(CF_3SO_2)_2NH$  (HTFSI). *J. Phys. Chem. A* **1998**, *102*, 3249-3258.
- (4) Castriota, M.; Caruso, T.; Agostino, R. G.; Cazzanelli, E.; Henderson, W. A.; Passerini, S. Raman Investigation of the Ionic Liquid N-Methyl-N-propylpyrrolidinium Bis(trifluoromethanesulfonyl)imide and Its Mixture with  $LiN(SO_2CF_3)_2$ . *J. Phys. Chem. A* **2004**, *109*, 92-96.
- (5) Langseth, A.; So/rensen, J. U.; Nielsen, J. R. Raman Spectrum of Carbon Disulphide. *J. Chem. Phys.* **1934**, *2*, 402-409.
- (6) Ito, M. Raman and Infrared Spectra of Crystalline Carbon Disulfide. *J. Chem. Phys.* **1965**, *42*, 815-818.
